# Supplementary material for: Hyphal Development in Candida albicans Requires Two Temporally Linked Changes in Promoter Chromatin for Initiation and Maintenance
Source: PubMed Central journal article supplement (PMC3139633; doi:10.1371/journal.pbio.1001105), 2011-07-19
Supplement: pbio.1001105.s006.pdf [file pbio.1001105.s006.pdf]

A

|                  | Mean (% germ tubes) ± SE (standard error) |          |           |           |
|------------------|-------------------------------------------|----------|-----------|-----------|
|                  | YPD+ 10% Serum                            | Spider   | M199 PH 8 | Lee's Man |
| Wild type        | 92.7 ± 1.5                                | 66.4±2.6 | 84.3±1.4  | 76.5±2.1  |
| <i>hda1/hda1</i> | 83.2±2.4                                  | 52.8±3.1 | 20.6±1.2  | 11.3±2.3  |

B

|                             | Mean (% germ tubes) ± SE (standard error) |          |           |           |
|-----------------------------|-------------------------------------------|----------|-----------|-----------|
|                             | YPD + 10% Serum                           | Spider   | M199 PH 8 | Lee's Man |
| Wild type                   | 96.8±1.9                                  | 76.7±2.4 | 87.4±3.2  | 83.3±1.8  |
| <i>yng2<sup>K175R</sup></i> | 97.4±1.4                                  | 79.2±2.8 | 90.5±1.6  | 84.8±2.1  |
| <i>yng2<sup>K175Q</sup></i> | 92.3±2.3                                  | 73.4±2.8 | 82.7±2.5  | 70.5±3.3  |
